# Supplementary material for: Synthesis and aggregation properties of a series of dumbbell polyhedral oligosilsesquioxane-perylene diimide triads
Source: Royal Society of Chemistry journal article supplement (doi:10.1039/c4ce02392g), 2015-01-01
Supplement: c4ce02392g1.pdf [file c4ce02392g1.pdf]

**Electronic Supplementary Information (ESI) for**

**Synthesis and Aggregation Properties of A Series of Dumbbell  
Polyhedral-Oligosilsesquioxane-Perylene Diimide Triad**

**Ying Zhang, Liangliang Zhang, Heyuan Liu, Di Sun, and Xiyou Li\***

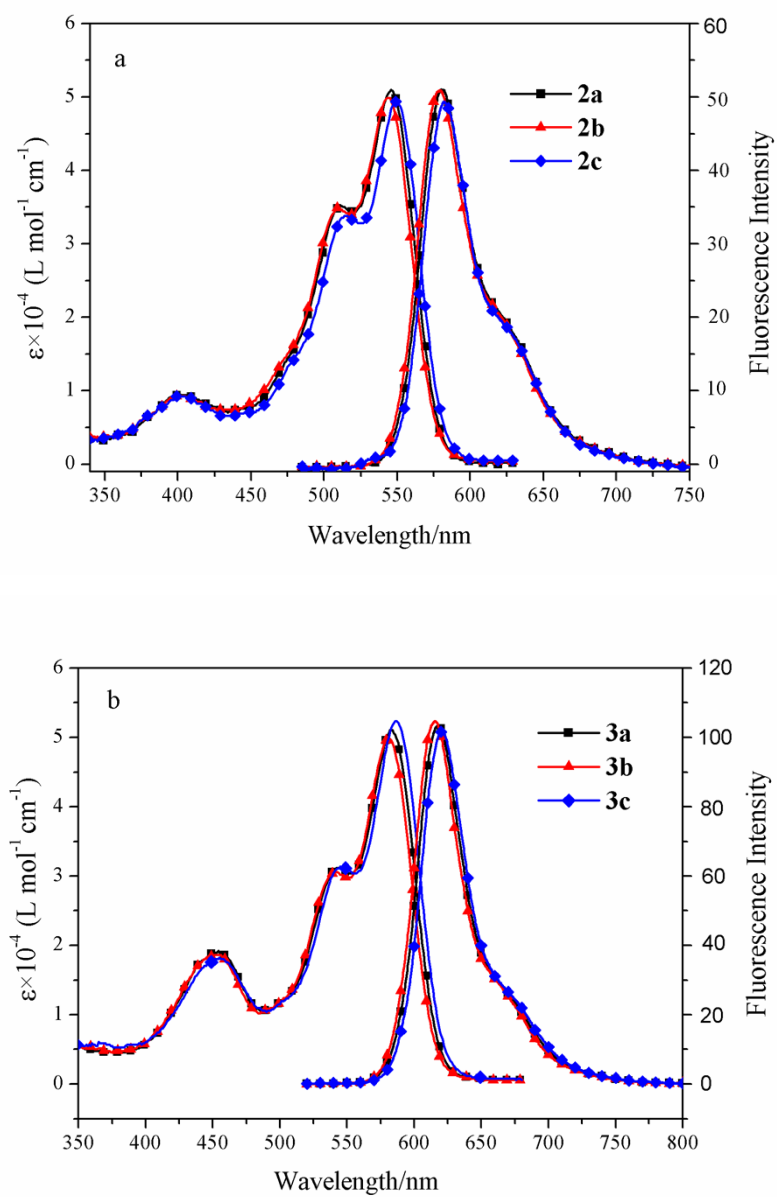

**Fig. S1** UV-vis absorption (left) and fluorescence (right) spectra of **2a-c** (a) and **3a-c** (b) in chloroform ( $5.0 \times 10^{-6} \text{M}$ ) at room temperature.

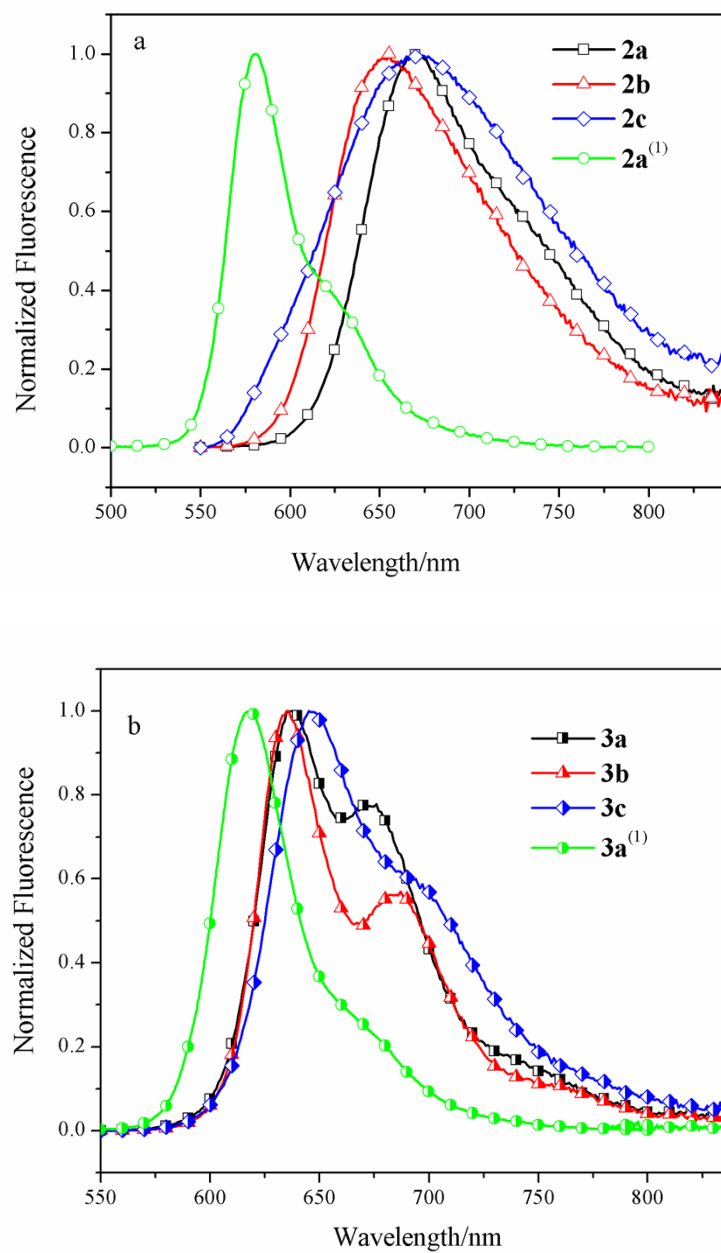

**Fig. S2** Normalized Fluorescence spectra of thin films of **2a-c** (a) and **3a-c** (b).

(1): With monomeric **3a** ( $5.0 \times 10^{-6} \text{M}$ ) as reference.

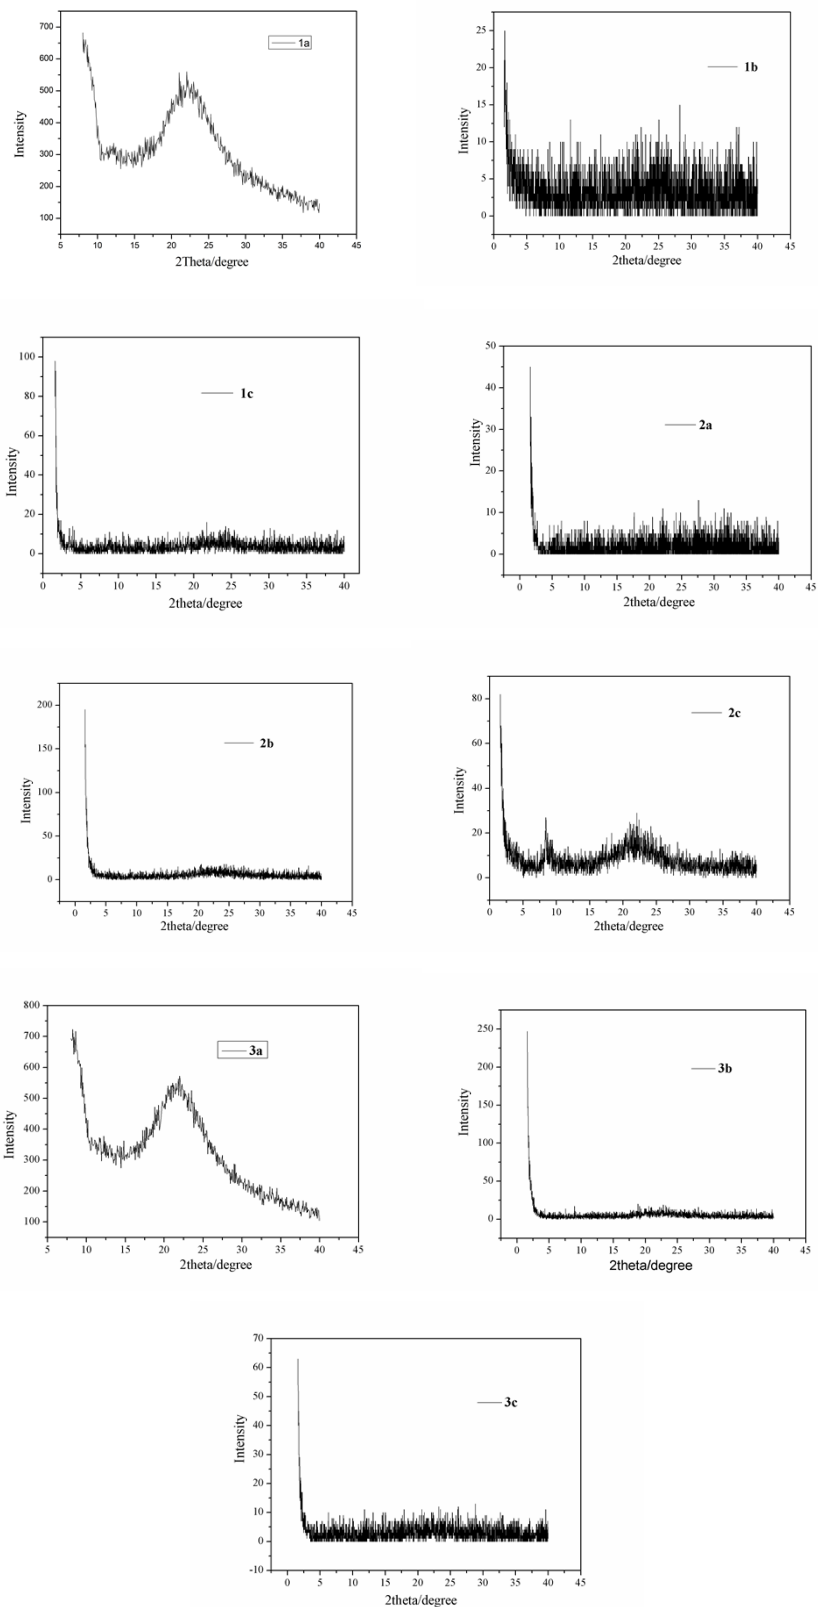

**Fig. S3** The X-ray diffraction patterns of thin film of compound **1a-c**, **2a-c** and **3a-c** on quartz glass substrate

## Single Crystal X-ray Analysis

**Table 1** Crystal data and structure refinements for **1b**, **3b** and **3c**.

| Compound                                                     | <b>1b</b>                                                        | <b>3b</b>                                                        | <b>3c</b>                                                        |
|--------------------------------------------------------------|------------------------------------------------------------------|------------------------------------------------------------------|------------------------------------------------------------------|
| Formula                                                      | $C_{86}H_{146}N_2O_{28}Si_{16}$                                  | $C_{132}H_{190}N_2O_{32}Si_{16} \cdot 2CHCl_3$                   | $C_{132}H_{190}N_2O_{32}Si_{16} \cdot 3CHCl_3$                   |
| Formula Mass                                                 | 2105.49                                                          | 2937.00                                                          | 3124.40                                                          |
| Crystal group                                                | triclinic                                                        | triclinic                                                        | triclinic                                                        |
| Space group                                                  | <i>p</i> -1                                                      | <i>p</i> -1                                                      | <i>p</i> -1                                                      |
| <i>a</i> [Å]                                                 | 11.3824(2)                                                       | 10.975(4)                                                        | 15.310(8)                                                        |
| <i>b</i> [Å]                                                 | 21.8344(4)                                                       | 21.227(7)                                                        | 15.323(9)                                                        |
| <i>c</i> [Å]                                                 | 23.7734(5)                                                       | 34.042(10)                                                       | 37.78(2)                                                         |
| $\alpha$ [°]                                                 | 86.5313(16)                                                      | 87.099(7)                                                        | 100.751(10)                                                      |
| $\beta$ [°]                                                  | 81.6042(18)                                                      | 82.157(6)                                                        | 95.049(11)                                                       |
| $\gamma$ [°]                                                 | 83.2088(17)                                                      | 83.536(6)                                                        | 102.622(10)                                                      |
| <i>V</i> [Å <sup>3</sup> ]                                   | 5798.4(2)                                                        | 7802(4)                                                          | 8420(8)                                                          |
| <i>Z</i>                                                     | 2                                                                | 2                                                                | 2                                                                |
| $\rho$ (calc) (g/cm <sup>3</sup> )                           | 1.206                                                            | 1.250                                                            | 1.232                                                            |
| Temperature (K)                                              | 293                                                              | 196                                                              | 190                                                              |
| $\lambda$ (Å)                                                | 1.5418                                                           | 0.71073                                                          | 0.71073                                                          |
| <i>F</i> (000)                                               | 2700                                                             | 3120                                                             | 3300                                                             |
| $\mu$ (mm <sup>-1</sup> )                                    | 2.215                                                            | 0.300                                                            | 0.328                                                            |
| <i>R</i> <sub>int</sub>                                      | 0.1186                                                           | 0.1484                                                           | 0.1417                                                           |
| Reflections collected                                        | 60760                                                            | 38909                                                            | 41600                                                            |
| Independent reflns                                           | 21454                                                            | 27089                                                            | 29191                                                            |
| Data/restraints/parameters                                   | 21454/608/1109                                                   | 27089/885/1641                                                   | 29191/837/1516                                                   |
| Final <i>R</i> indexes [ <i>I</i> > 2 $\sigma$ ( <i>I</i> )] | <i>R</i> <sub>1</sub> =0.2148,<br><i>wR</i> <sub>2</sub> =0.5006 | <i>R</i> <sub>1</sub> =0.1564,<br><i>wR</i> <sub>2</sub> =0.3681 | <i>R</i> <sub>1</sub> =0.1858,<br><i>wR</i> <sub>2</sub> =0.4245 |
| Final <i>R</i> indexes [all data]                            | <i>R</i> <sub>1</sub> =0.3009,<br><i>wR</i> <sub>2</sub> =0.5282 | <i>R</i> <sub>1</sub> =0.4307,<br><i>wR</i> <sub>2</sub> =0.4660 | <i>R</i> <sub>1</sub> =0.4064,<br><i>wR</i> <sub>2</sub> =0.5002 |
| GOF on <i>F</i> <sup>2</sup>                                 | 1.159                                                            | 0.778                                                            | 0.864                                                            |
